# Supplementary material for: Anin situ-fabricated p-Co3O4@n-ZnO surface heterojunction photocatalyst for solar-to-fuel conversion of CO2
Source: Royal Society of Chemistry journal article supplement (doi:10.1039/d2qm00850e), 2022-12-19
Supplement: d2qm00850e1.pdf [file d2qm00850e1.pdf]

## Supporting Information

### **In situ-fabricated p-Co<sub>3</sub>O<sub>4</sub>@n-ZnO surface heterojunction photocatalyst for solar-to-fuel conversion of CO<sub>2</sub>**

Qiuyan Wang, ‡<sup>a</sup> Kui Chen, ‡<sup>a</sup> Shuhui Wang,<sup>b</sup> Daheng Jiang,<sup>a</sup> Changqiu Ma,<sup>a</sup> Lixin

Zhu<sup>\*c</sup> and Xiaoliang Xu<sup>\*a</sup>

<sup>a</sup> Key Laboratory of Strongly-Coupled Quantum Matter Physics, Chinese Academy of Sciences, School of Physical Sciences, University of Science and Technology of China, Hefei, Anhui 230026, PR China.

<sup>b</sup> Fujian Key Laboratory of Agricultural Information Sensing Technology, College of Mechanical and Electrical Engineering, Fujian Agriculture and Forestry University, Fuzhou, Fujian 350002, PR China.

<sup>c</sup> Department of General Surgery and Central Laboratory, the First Affiliated Hospital of Anhui Medical University, Hefei, Anhui 230022, PR China.

‡ These authors contributed equally to this work.

\*Corresponding authors: Lixin Zhu (zhulixin@ahmu.edu.cn)

Xiaoliang Xu (xlxu@ustc.edu.cn)

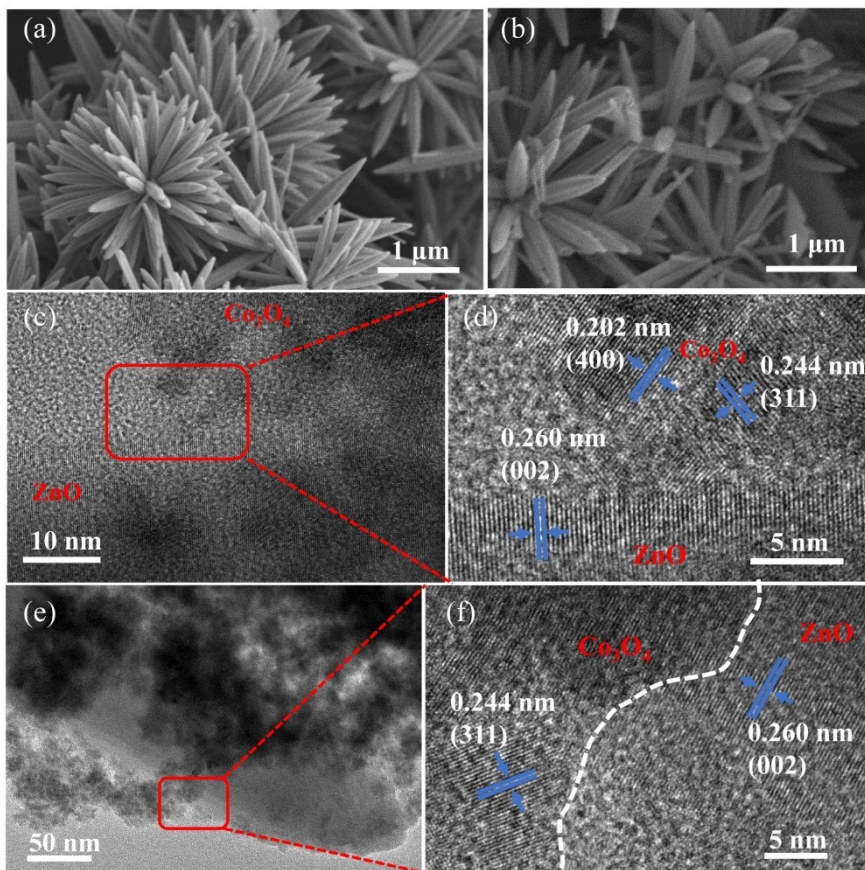

**Fig. S1** (a, b) The SEM images of ZnO, (c-f) the HRTEM images of  $\text{Co}_3\text{O}_4@\text{ZnO}$ .

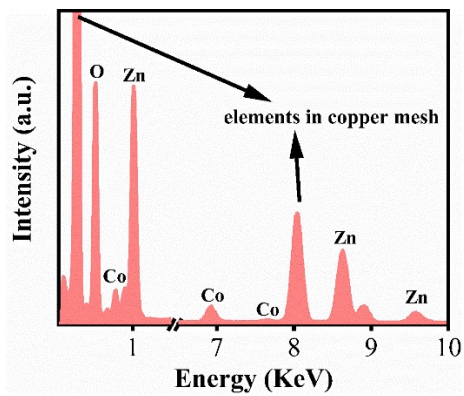

**Fig. S2** Corresponding element energy spectrum of Fig. 1f.

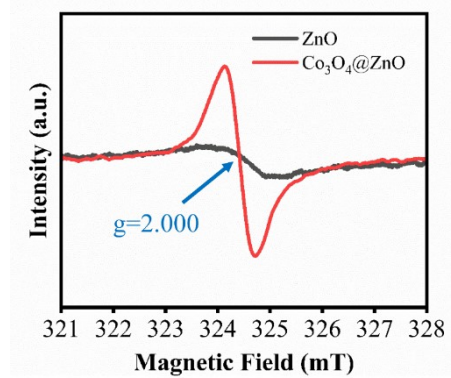

**Fig. S3** EPR spectra of ZnO and  $\text{Co}_3\text{O}_4@\text{ZnO}$ .

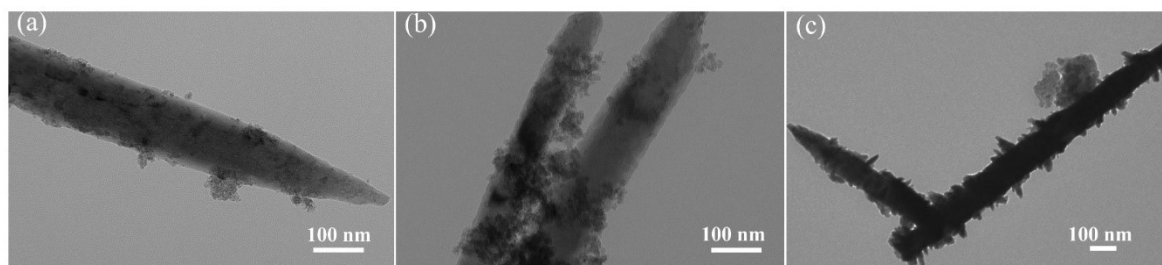

**Fig. S4** The TEM images of (a) 0.3- $\text{Co}_3\text{O}_4@\text{ZnO}$ , (b) 0.6- $\text{Co}_3\text{O}_4@\text{ZnO}$ , and (c) 0.9- $\text{Co}_3\text{O}_4@\text{ZnO}$ .

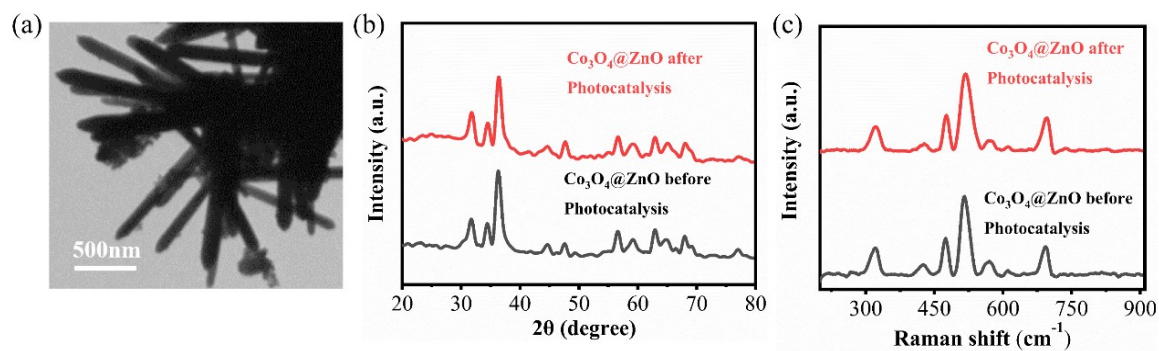

**Fig. S5** (a) TEM, (b) XRD and (c) Raman characterizations for  $\text{Co}_3\text{O}_4@\text{ZnO}$  after 30 h photoreduction  $\text{CO}_2$  reaction.

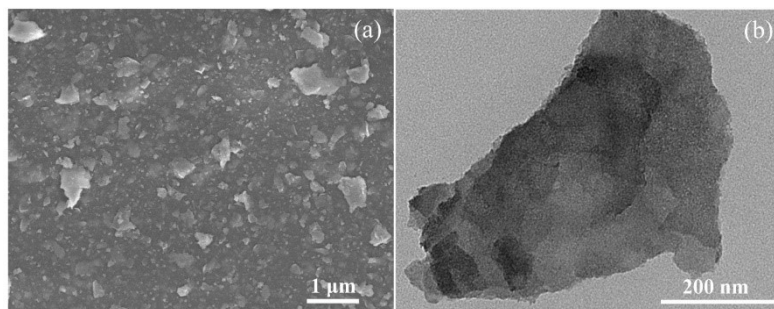

**Fig. S6** (a) SEM and (b) TEM images of  $\text{Co}_3\text{O}_4$ .

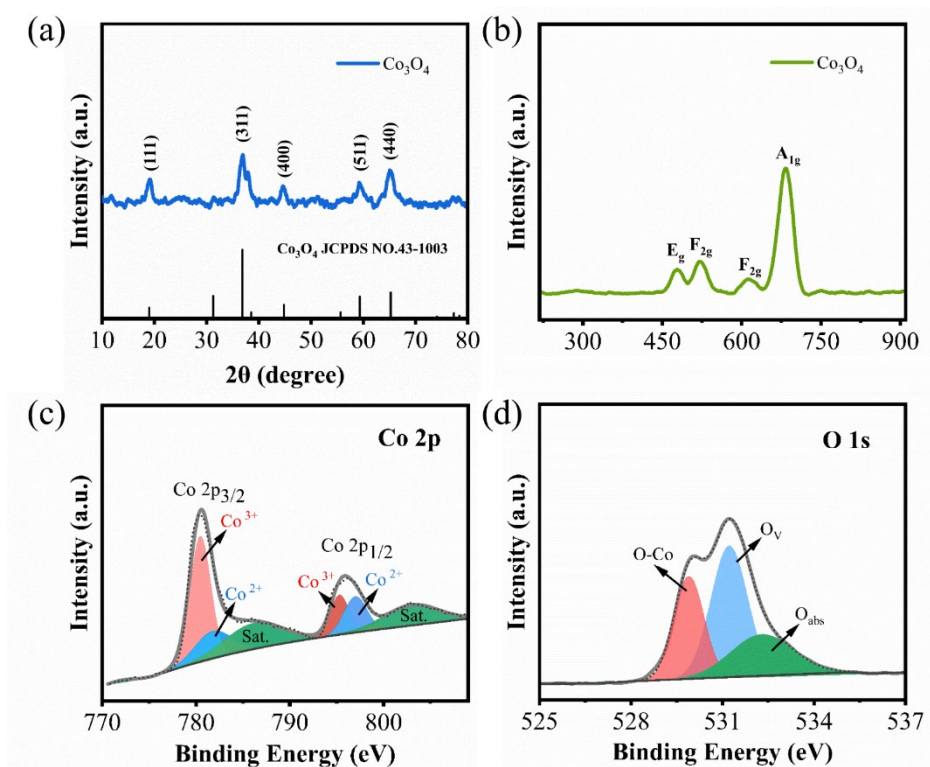

**Fig. S7** (a) XRD pattern, (b) Raman spectrum of  $\text{Co}_3\text{O}_4$ . High-resolution XPS spectra of  $\text{Co}_3\text{O}_4$ : (c) Co 2p and (d) O 1s.

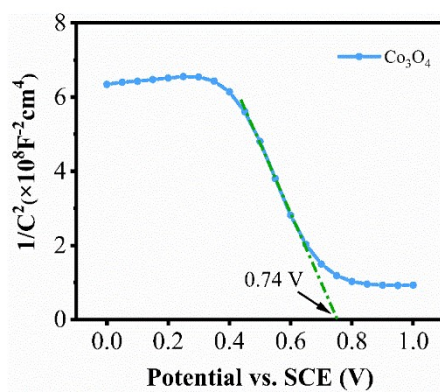

**Fig. S8** Mott-Schottky plot of  $\text{Co}_3\text{O}_4$ .

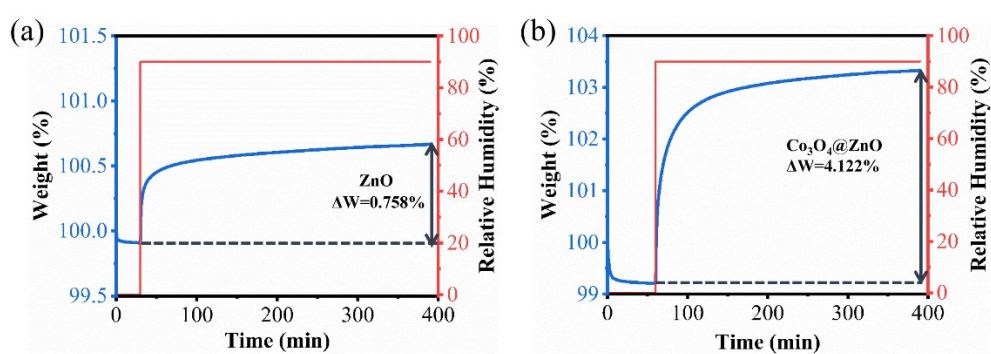

**Fig. S9** Dynamic  $\text{H}_2\text{O}$  vapor adsorption isotherms of (a)  $\text{ZnO}$ , and (b)  $\text{Co}_3\text{O}_4@\text{ZnO}$ .

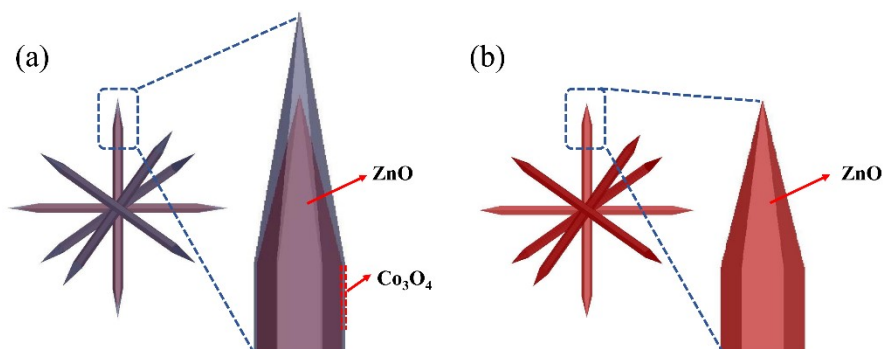

**Fig. S10** The models of (a)  $\text{Co}_3\text{O}_4@\text{ZnO}$  and (b)  $\text{ZnO}$  for FDTD simulations.

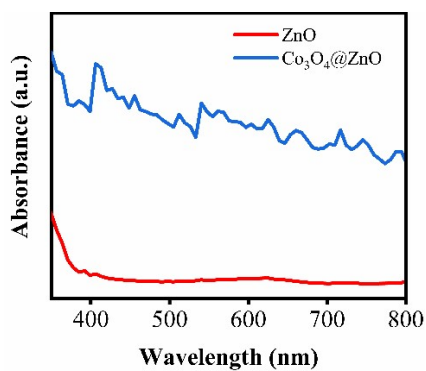

**Fig. S11** The simulated UV–vis absorption spectra of ZnO and  $\text{Co}_3\text{O}_4@\text{ZnO}$ .

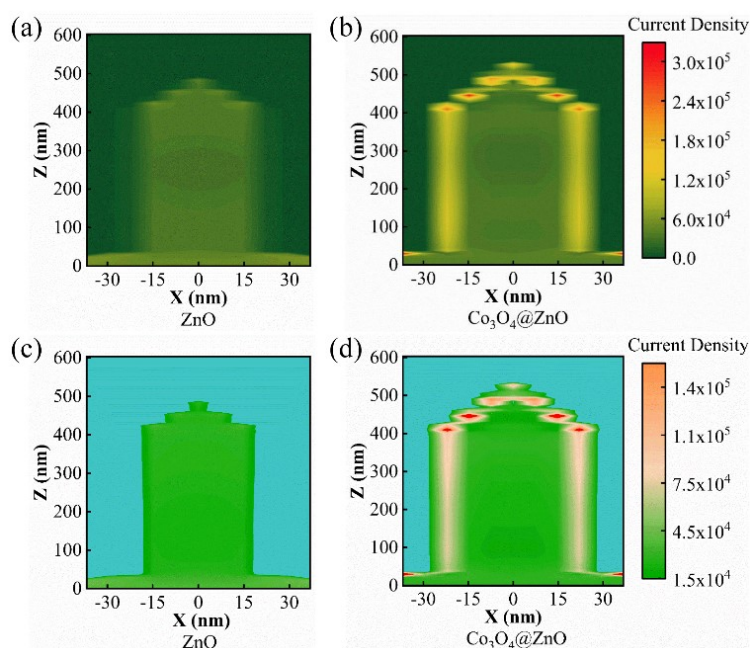

**Fig. S12** The simulations of photocurrent density distribution of ZnO and  $\text{Co}_3\text{O}_4@\text{ZnO}$  under light irradiation at (a, b) 550 nm and (c, d) 700 nm.

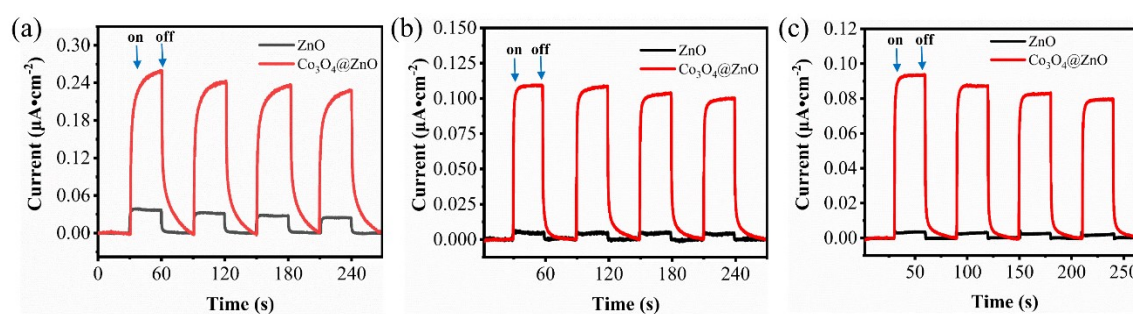

**Fig. S13** The single-band I-t of ZnO and  $\text{Co}_3\text{O}_4@\text{ZnO}$  under light irradiation at (a)

400, (b) 550, and (c) 700 nm.

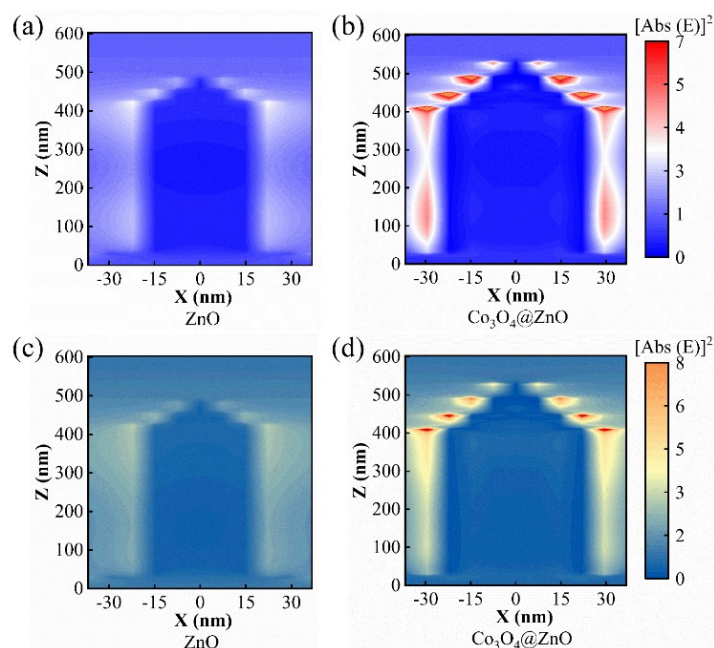

**Fig. S14** The simulations of electric field distribution of ZnO and Co<sub>3</sub>O<sub>4</sub>@ZnO under light irradiation at (a, b) 550 nm and (c, d) 700 nm.

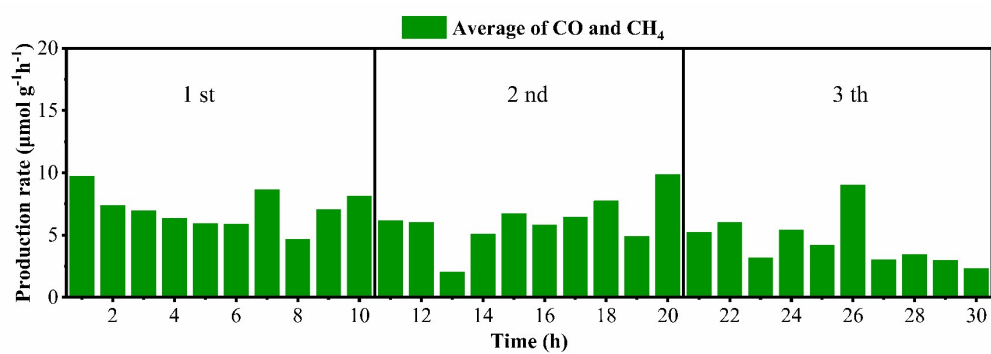

**Fig. S15** The average production rate of CO and CH<sub>4</sub> every hour of Co<sub>3</sub>O<sub>4</sub>@ZnO in stability test.

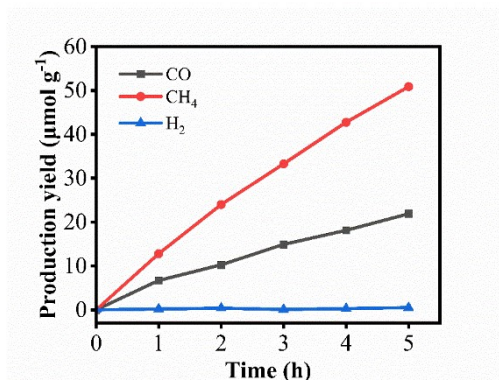

**Fig. S16** Time-dependent performance of CO, CH<sub>4</sub> and H<sub>2</sub> yields of Co<sub>3</sub>O<sub>4</sub>@ZnO.

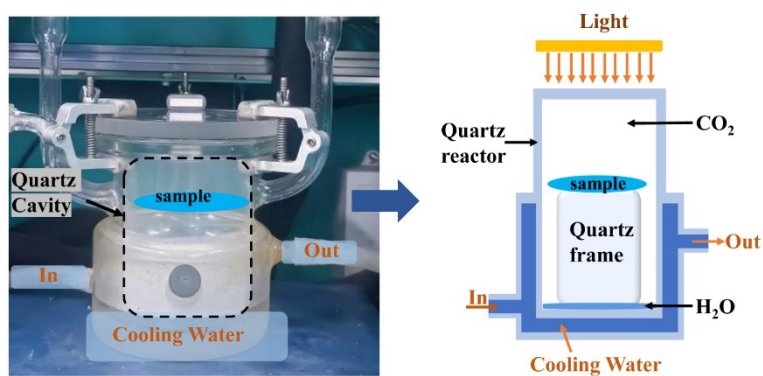

**Fig. S17** The schematic diagram of reaction device for photocatalytic CO<sub>2</sub> reduction.

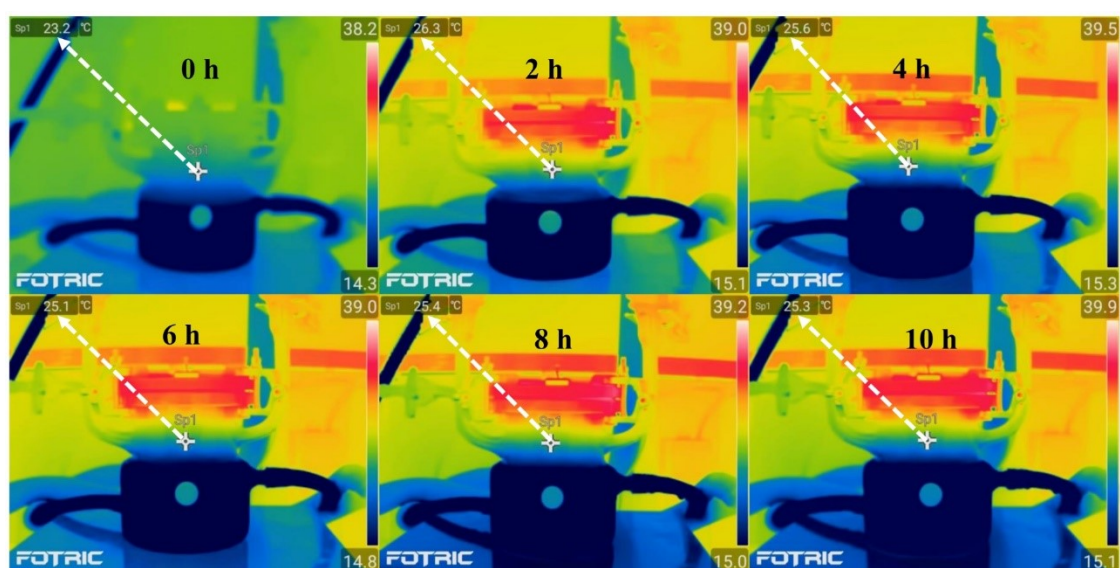

**Fig. S18** The infrared images during the CO<sub>2</sub> photoreduction reaction.



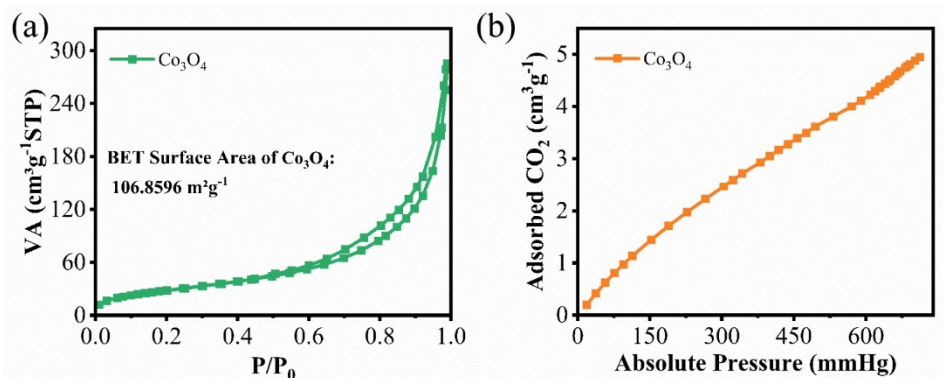

**Fig. S19** (a)  $N_2$  adsorption-desorption isotherm and (b)  $CO_2$  adsorption isotherm of  $Co_3O_4$ .

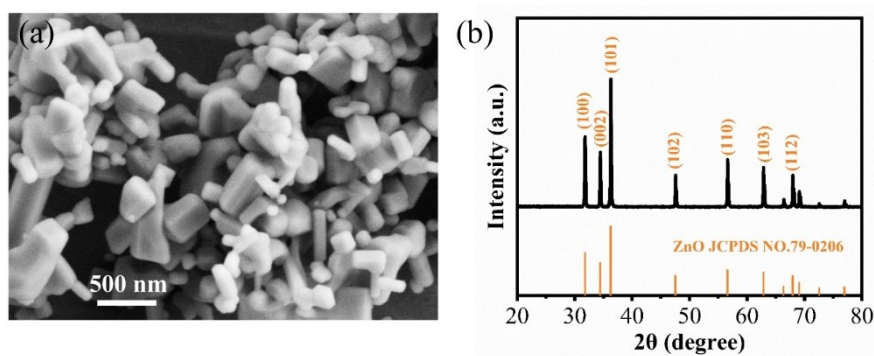

**Fig. S20** (a) SEM image and (b) XRD pattern of raw material ZnO.

### Synthesis of $Co_3O_4$ :

The synthesis strategy of  $Co_3O_4$  was similar to that of  $Co_3O_4@ZnO$ , except that solution A was absent. Specifically, the as-synthesized cobalt-based fragments were dispersed uniformly in an aqueous solution. The above system was then heated to  $55^\circ C$  for 30 min, followed by rapid cooling and collection of the reaction product. The precipitate was repeatedly washed with ethanol and deionized water. Finally, the product was dried at  $80^\circ C$  for 48 h. The resulting sample was labeled  $Co_3O_4$ .

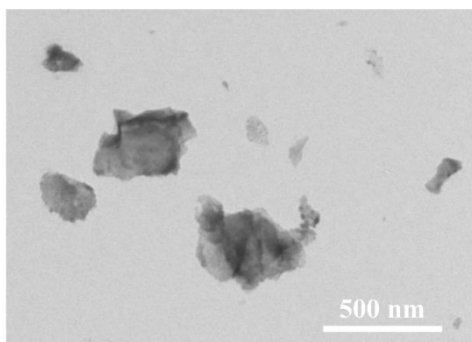

**Fig. S21** TEM image of cobalt-based fragments.

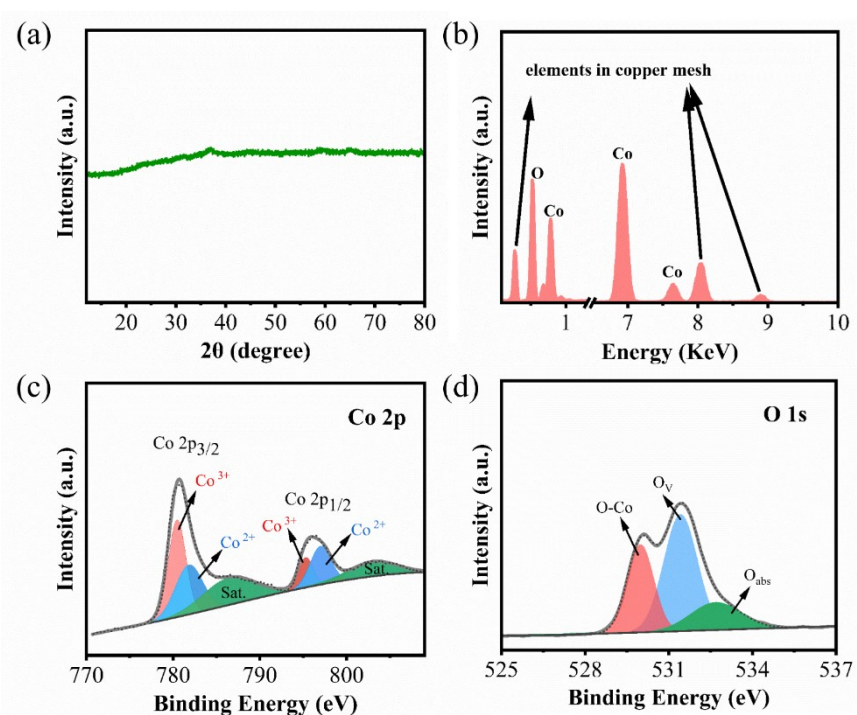

**Fig. S22** (a) XRD pattern, (b) element energy spectrum of cobalt-based fragments.

High-resolution XPS spectra of cobalt-based fragments: (c) Co 2p and (d) O 1s.

Cobalt based fragments exhibit poor crystallinity. Element energy spectrum shows that Co and O elements are included in the cobalt-based fragments. Combined with the results of high-resolution XPS spectra, it can be inferred that the cobalt-based fragments are poorly crystallized cobalt oxides.  $\text{Co}_3\text{O}_4$  nanosheets were converted from cobalt-based fragments due to oxidation and recrystallization during the solvothermal reaction.

### Quantum efficiency (QE) calculation:

$$\text{QE (\%)} = (\text{Number of effective electrons}) / (\text{Number of total photons}) \times 100\% \quad (\text{S1})$$

$$\text{Number of effective electrons} = [2 \times r(\text{CO}) + 8 \times r(\text{CH}_4)] \times N_A = \text{T-electrons} \times N_A \quad (\text{S2})$$

$$\text{Number of total photons} = (\text{Light absorbed by the photocatalyst}) \times t / (\text{Average photon energy}) \quad (\text{S3})$$

$$\text{light absorbed by the photocatalyst} = \mathbf{H} \times \mathbf{S} \quad (\text{S4})$$

$$\text{Average photon energy} = hc/\lambda \quad (\text{S5})$$

$$\text{QE (\%)} = (\text{T-electrons} \times N_A \times hc) / (\mathbf{H} \times \mathbf{S} \times t \times \lambda) \quad (\text{S6})$$

Where  $r(\text{CO})$  and  $r(\text{CH}_4)$  is the generation rates of CO and CH<sub>4</sub> for photocatalyst, respectively.  $N_A$  is Avogadro's constant ( $N_A = 6.022 \times 10^{23} \text{ mol}^{-1}$ ).  $h$  is Planck's constant ( $h = 6.63 \times 10^{-34} \text{ J}\cdot\text{s}$ ).  $\mathbf{H}$  represents the light input, which is  $230 \text{ mW}\cdot\text{cm}^{-2}$  detected by the light power meter.  $t = 3600 \text{ s}$ , and  $c = 3 \times 10^8 \text{ m}\cdot\text{s}^{-1}$ .  $\mathbf{S}$  is the irradiation area of the photocatalyst placed on the quartz plate inside the reactor ( $\mathbf{S} = 28.26 \text{ cm}^2$ ).

The T-electrons of ZnO, Co<sub>3</sub>O<sub>4</sub>, 0.3-Co<sub>3</sub>O<sub>4</sub>@ZnO, 0.6-Co<sub>3</sub>O<sub>4</sub>@ZnO, and 0.9-Co<sub>3</sub>O<sub>4</sub>@ZnO are 2.44, 9.16, 57.4, 89.26, 61.82  $\mu\text{mol g}^{-1} \text{ h}^{-1}$  respectively. So the corresponding QE is calculated to be 0.0025%, 0.0094%, 0.0588%, 0.0914%, 0.0633%, respectively.

**Table S1** The mass proportion of Zn and Co elements in the three different Co<sub>3</sub>O<sub>4</sub>@ZnO heterojunctions

| Sample ID | w <sub>Co</sub> (mg L <sup>-1</sup> ) | w <sub>Zn</sub> (mg L <sup>-1</sup> ) |
|-----------|---------------------------------------|---------------------------------------|
|-----------|---------------------------------------|---------------------------------------|

|                                         |       |        |
|-----------------------------------------|-------|--------|
| 0.3-Co <sub>3</sub> O <sub>4</sub> @ZnO | 0.772 | 32.66  |
| 0.6-Co <sub>3</sub> O <sub>4</sub> @ZnO | 2.941 | 36.31  |
| 0.9-Co <sub>3</sub> O <sub>4</sub> @ZnO | 5.069 | 35.683 |

Mass proportion of Co<sub>3</sub>O<sub>4</sub> in Co<sub>3</sub>O<sub>4</sub>@ZnO composites =  $w(\text{Co}_3\text{O}_4) / [w(\text{Co}_3\text{O}_4) + w(\text{ZnO})]$  (S7)

$w(\text{Co}_3\text{O}_4) = n(\text{Co}_3\text{O}_4) \times M(\text{Co}_3\text{O}_4)$  (S8)

$w(\text{ZnO}) = n(\text{ZnO}) \times M(\text{ZnO})$  (S9)

For Co<sub>3</sub>O<sub>4</sub>,  $n(\text{Co}_3\text{O}_4) = n(\text{Co}) / 3$  (S10)

For ZnO,  $n(\text{ZnO}) = n(\text{Zn})$  (S11)

$n(x) = w(x) / M(x)$ , (x = Co, Zn, Co<sub>3</sub>O<sub>4</sub>, and ZnO) (S12)

So  $w(\text{Co}_3\text{O}_4) = w(\text{Co}) \times M(\text{Co}_3\text{O}_4) / [3 \times M(\text{Co})]$  (S13)

$w(\text{ZnO}) = w(\text{Zn}) \times M(\text{ZnO}) / M(\text{Zn})$  (S14)

Where  $w(x)$ ,  $n(x)$ , and  $M(x)$  is the weight, amount of substance, and molar mass of  $x$  ( $x = \text{Co}$ ,  $\text{Zn}$ ,  $\text{Co}_3\text{O}_4$ , and  $\text{ZnO}$ ), respectively. The  $M(\text{Co})$ ,  $M(\text{Zn})$ ,  $M(\text{Co}_3\text{O}_4)$  and  $M(\text{ZnO})$  is 58.93, 65.93, 240.79, and 81.39 g mol<sup>-1</sup>, respectively.

For 0.3-Co<sub>3</sub>O<sub>4</sub>@ZnO,  $w(\text{Co})$  and  $w(\text{Zn})$  is 0.772 and 32.66 mg L<sup>-1</sup>, respectively.

According to the eq S7, S13 and S14, mass proportion of Co<sub>3</sub>O<sub>4</sub> in 0.3-Co<sub>3</sub>O<sub>4</sub>@ZnO is calculated to be 2.5%. Similarly, the mass proportion of Co<sub>3</sub>O<sub>4</sub> in 0.6-Co<sub>3</sub>O<sub>4</sub>@ZnO and 0.9-Co<sub>3</sub>O<sub>4</sub>@ZnO is 8.1% and 13.5%, respectively.

**Table S2** The comparison of CO<sub>2</sub> reduction performance of photocatalysts in this work and recently reported literatures

| Photocatalyst | Light | Reaction system | T-electrons | CH <sub>4</sub> | Ref. |
|---------------|-------|-----------------|-------------|-----------------|------|
|---------------|-------|-----------------|-------------|-----------------|------|

|                                                                                     | source                                 |                                                                                                                                                       | rates <sup>a</sup> ( $\mu\text{mol g}^{-1} \text{h}^{-1}$ ) | selectivity <sup>b</sup> and stability |           |
|-------------------------------------------------------------------------------------|----------------------------------------|-------------------------------------------------------------------------------------------------------------------------------------------------------|-------------------------------------------------------------|----------------------------------------|-----------|
| Co <sub>3</sub> O <sub>4</sub> @ZnO                                                 | 300W Xe lamp (AM 1.5)                  | H <sub>2</sub> O (2 mL), CO <sub>2</sub> (88 kPa)                                                                                                     | 89.26 (CO:4.23 CH <sub>4</sub> :10.1)                       | 70.5%<br>30 h                          | This work |
| Porous ZnO with exposed (110) facets                                                | 300W Xe lamp                           | Na <sub>2</sub> SO <sub>3</sub> (0.25 M) and NaOH (1 M) saturated CO <sub>2</sub>                                                                     | 1.912 (CO:0.76 CH <sub>4</sub> :0.049)                      | 11.0%<br>8 h                           | 1         |
| ZnO/ZnMn <sub>2</sub> O <sub>4</sub> heterojunction                                 | 300W Xe lamp                           | NaHCO <sub>3</sub> (0.12 g) and H <sub>2</sub> SO <sub>4</sub> (0.25 mL, 2 M)                                                                         | 8.74 (CO: 3.251 CH <sub>4</sub> :0.275)                     | 7.9%<br>24 h                           | 2         |
| ZnO/g-C <sub>3</sub> N <sub>4</sub> heterojunction                                  | UVC lamp with maximum length of 254 nm | H <sub>2</sub> O (100 mL)                                                                                                                             | 10.16 (CO: 2.1 CH <sub>4</sub> : 0.745)                     | 26.2%<br>6 h                           | 3         |
| ZnO nanoplates with defects                                                         | 300W Xe lamp                           | Na <sub>2</sub> SO <sub>3</sub> (100 mL, 0.25 M) and NaOH (1M) saturated CO <sub>2</sub>                                                              | 1.9 (CO: 0.95)                                              | -<br>4 h                               | 4         |
| CdS/ZnO heterojunction                                                              | Visible light ( $\lambda > 400$ nm)    | H <sub>2</sub> O (10 mL), CO <sub>2</sub> (0.4 MPa)                                                                                                   | 7.8 (CO: 3.9)                                               | -<br>8 h                               | 5         |
| 100Cu <sub>2</sub> O-0.1Pd                                                          | 300W Xe lamp (420-filter)              | Na <sub>2</sub> SO <sub>3</sub> (0.01 M), CO <sub>2</sub> (0.4 MPa)                                                                                   | 0.26 (CO: 0.13)                                             | -<br>8 h                               | 6         |
| TiO <sub>2</sub> /CsPbBr <sub>3</sub> heterojunction                                | 300 W Xe lamp                          | H <sub>2</sub> O (100 $\mu$ L), CO <sub>2</sub> (80 kPa), acetonitrile (30 mL)                                                                        | 18.04 (CO: 9.02)                                            | -<br>16 h                              | 7         |
| AuNPs@SCX <sub>4</sub> <sup>+</sup>                                                 | 300 W Xe lamp (AM 1.5)                 | NaHCO <sub>3</sub> (84 mg) and H <sub>2</sub> SO <sub>4</sub> (0.25 mL, 2 M)                                                                          | 3.37 (CO:1.685)                                             | -<br>16 h                              | 8         |
| CdS/N-doped graphene                                                                | 350 W Xe lamp (420-filter)             | H <sub>2</sub> SO <sub>4</sub> solution (0.3mL, 2M), NaHCO <sub>3</sub> (84 mg)                                                                       | 7.6 (CO: 2.6 CH <sub>4</sub> :0.3)                          | 10.3%<br>12 h                          | 9         |
| Porous Co <sub>3</sub> O <sub>4</sub>                                               | LED lamp                               | Acetonitrile / H <sub>2</sub> O mixture, TEOA as the electron donor and [Ru(bpy) <sub>3</sub> ]Cl <sub>2</sub> ·6H <sub>2</sub> O as photo-sensitizer | 9.04 (CO: 4.52)                                             | -<br>30 h                              | 10        |
| Phosphate modified-CeO <sub>2</sub> /g-C <sub>3</sub> N <sub>4</sub> heterojunction | 300 W Xe lamp                          | H <sub>2</sub> O (5 mL), CO <sub>2</sub> (4 bar)                                                                                                      | 1.04 (CO: 0.52)                                             | -<br>24 h                              | 11        |

|                                                                    |                            |                                                    |                                               |              |    |
|--------------------------------------------------------------------|----------------------------|----------------------------------------------------|-----------------------------------------------|--------------|----|
| ZnIn <sub>2</sub> S <sub>4</sub> /BiVO <sub>4</sub> heterojunction | 300 W Xe lamp              | H <sub>2</sub> O (0.4 mL), CO <sub>2</sub> (1 atm) | 11.7<br>(CO: 4.75<br>CH <sub>4</sub> : 0.275) | 5.5%<br>5 h  | 12 |
| CeO <sub>2</sub> /CuS heterojunction                               | 300 W Xe lamp              | H <sub>2</sub> O, CO <sub>2</sub>                  | 8.48<br>(CO:4.24)                             | -<br>4 h     | 13 |
| Ag-Cu <sub>2</sub> O/ZnO heterojunction                            | 300 W Xe lamp              | H <sub>2</sub> O (0.5 mL), CO <sub>2</sub> (1 atm) | 6.72<br>(CO: 3.36)                            | -<br>16 h    | 14 |
| Ti <sub>3</sub> C <sub>2</sub> /g-C <sub>3</sub> N <sub>4</sub>    | 300 W Xe lamp (420-filter) | H <sub>2</sub> O, CO <sub>2</sub>                  | 6.6<br>(CO: 2.8<br>CH <sub>4</sub> : 0.125)   | 4.3%<br>25 h | 15 |

<sup>a</sup> T-electrons rates = 2r(CO) + 8r(CH<sub>4</sub>), where r(CH<sub>4</sub>) and r(CO) are the generated rates of CH<sub>4</sub> and CO, respectively.

<sup>b</sup> CH<sub>4</sub> selectivity (%) = r(CH<sub>4</sub>) / [r(CO) + r(CH<sub>4</sub>)] × 100%.

## References

1. P. Li, H. Hu, G. Luo, S. Zhu, L. Guo, P. Qu, Q. Shen and T. He, Crystal Facet-Dependent CO<sub>2</sub> Photoreduction over Porous ZnO Nanocatalysts, *ACS Appl. Mater. Interfaces*, 2020, **12**, 56039-56048.
2. H. Deng, X. Fei, Y. Yang, J. Fan, J. Yu, B. Cheng and L. Zhang, S-scheme heterojunction based on p-type ZnMn<sub>2</sub>O<sub>4</sub> and n-type ZnO with improved photocatalytic CO<sub>2</sub> reduction activity, *Chem. Eng. J.*, 2020, **409**, 127377.
3. N. de Jesus Martins, I. C. H. Gomes, G. T. S. T. da Silva, J. A. Torres, W. Avansi, C. Ribeiro, A. R. Malagutti and H. A. J. L. Mourão, Facile preparation of ZnO:g-C<sub>3</sub>N<sub>4</sub> heterostructures and their application in amiloride photodegradation and CO<sub>2</sub> photoreduction, *J. Alloy. Compd.*, 2021, **856**, 156798.
4. P. Li, S. Zhu, H. Hu, L. Guo and T. He, Influence of defects in porous ZnO nanoplates on CO<sub>2</sub> photoreduction, *Catal. Today*, 2018, **335**, 300-305.
5. L. Zhang, L. Zhang, Y. Chen, Y. Zheng, J. Guo, S. Wan, S. Wang, C. K. Ngaw, J. Lin and Y. Wang, CdS/ZnO: A Multipronged Approach for Efficient Reduction of Carbon Dioxide under Visible Light Irradiation, *ACS Sustain. Chem. Eng.*, 2020, **8**, 5270-5277.
6. X. Zhang, X. Zhao, K. Chen, Y. Fan, S. Wei, W. Zhang, D. Han and L. Niu, Palladium-modified cuprous(I) oxide with {100} facets for photocatalytic CO<sub>2</sub> reduction, *Nanoscale*, 2021, **13**, 2883-2890.
7. F. Xu, K. Meng, B. Cheng, S. Wang, J. Xu and J. Yu, Unique S-scheme heterojunctions in self-assembled TiO<sub>2</sub>/CsPbBr<sub>3</sub> hybrids for CO<sub>2</sub> photoreduction, *Nat. Commun.*, 2020, **11**, 4613.
8. T. Skorjanc, K. M. Kamal, A. Alkhoori, G. Mali, A. K. Mohammed, Z. Asfari, K. Polychronopoulou, B. Likozar, A. Trabolssi and D. Shetty, Polythiacalixarene-

- Embedded Gold Nanoparticles for Visible-Light-Driven Photocatalytic CO<sub>2</sub> Reduction, *ACS Appl. Mater. Interfaces*, 2022, **14**, 30796-30801.
9. C. Bie, B. Zhu, F. Xu, L. Zhang and J. Yu, In Situ Grown Monolayer N-Doped Graphene on CdS Hollow Spheres with Seamless Contact for Photocatalytic CO<sub>2</sub> Reduction, *Adv. Mater.*, 2019, **31**, 1902868.
  10. W. Chen, B. Han, C. Tian, X. Liu, S. Liang, H. Deng and Z. Lin, MOFs-derived ultrathin holey Co<sub>3</sub>O<sub>4</sub> nanosheets for enhanced visible light CO<sub>2</sub> reduction, *Appl. Catal., B*, 2018, **244**, 996-1003.
  11. W. Li, L. Jin, F. Gao, H. Wan, Y. Pu, X. Wei, C. Chen, W. Zou, C. Zhu and L. Dong, Advantageous roles of phosphate decorated octahedral CeO<sub>2</sub> {111}/g-C<sub>3</sub>N<sub>4</sub> in boosting photocatalytic CO<sub>2</sub> reduction: Charge transfer bridge and Lewis basic site, *Appl. Catal., B*, 2021, **294**, 120257.
  12. Q. Han, L. Li, W. Gao, Y. Shen, L. Wang, Y. Zhang, X. Wang, Q. Shen, Y. Xiong, Y. Zhou and Z. Zou, Elegant Construction of ZnIn<sub>2</sub>S<sub>4</sub>/BiVO<sub>4</sub> Hierarchical Heterostructures as Direct Z-Scheme Photocatalysts for Efficient CO<sub>2</sub> Photoreduction, *ACS Appl. Mater. Interfaces*, 2021, **13**, 15092-15100.
  13. X. Li, M. Wang, R. Wang, M. Shen, P. Wu, Z. Fu, M. Zhu and L. Zhang, A distinctive semiconductor-metalloid heterojunction: unique electronic structure and enhanced CO<sub>2</sub> photoreduction activity, *J. Colloid Interface Sci.*, 2022, **615**, 821-830.
  14. F. Zhang, Y.-H. Li, M.-Y. Qi, Z.-R. Tang and Y.-J. Xu, Boosting the activity and stability of Ag-Cu<sub>2</sub>O/ZnO nanorods for photocatalytic CO<sub>2</sub> reduction, *Appl. Catal., B*, 2019, **268**, 118380.
  15. H. Wang, Q. Tang and Z. Wu, Construction of Few-Layer Ti<sub>3</sub>C<sub>2</sub> MXene and Boron-Doped g-C<sub>3</sub>N<sub>4</sub> for Enhanced Photocatalytic CO<sub>2</sub> Reduction, *ACS Sustain. Chem. Eng.*, 2021, **9**, 8425-8434.
